# Supplementary material for: Azoreductase activity of dye-decolorizing bacteria isolated from the human gut microbiota
Source: PubMed Central journal article supplement (PMC6445285; doi:10.1038/s41598-019-41894-8), 2019-04-02
Supplement: 41598_2019_41894_MOESM1_ESM.pdf [file 41598_2019_41894_MOESM1_ESM.pdf]

---

## Azoreductase activity of dye-decolorizing bacteria isolated from the human gut microbiota

---

Sara A. Zahran, Marwa Ali-Tammam, Abdelgawad M. Hashem, Ramy K. Aziz, Amal E. Ali

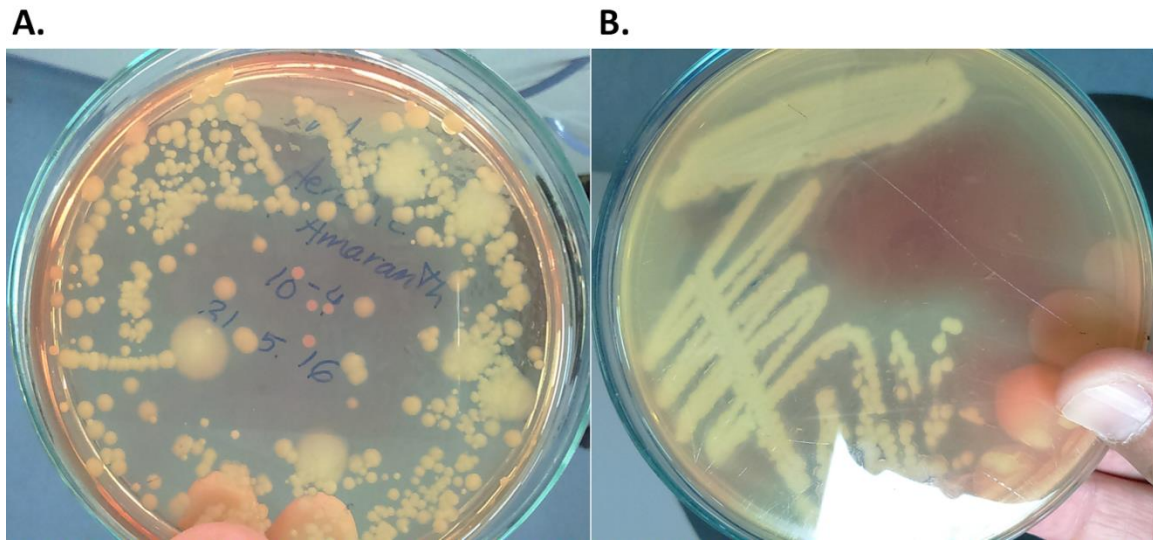

**Figure-S1:** Screening for azodye-reducing bacteria on BHIS agar supplemented with 20µM Amaranth. (A) Preliminary screening for azoreductase-producing bacteria from stool samples under aerobic conditions. (B) Single-colony isolation of colonies with promising activity in preliminary screens. Both cultures are on BHIS agar plates containing amaranth (20µM) and grown aerobically.

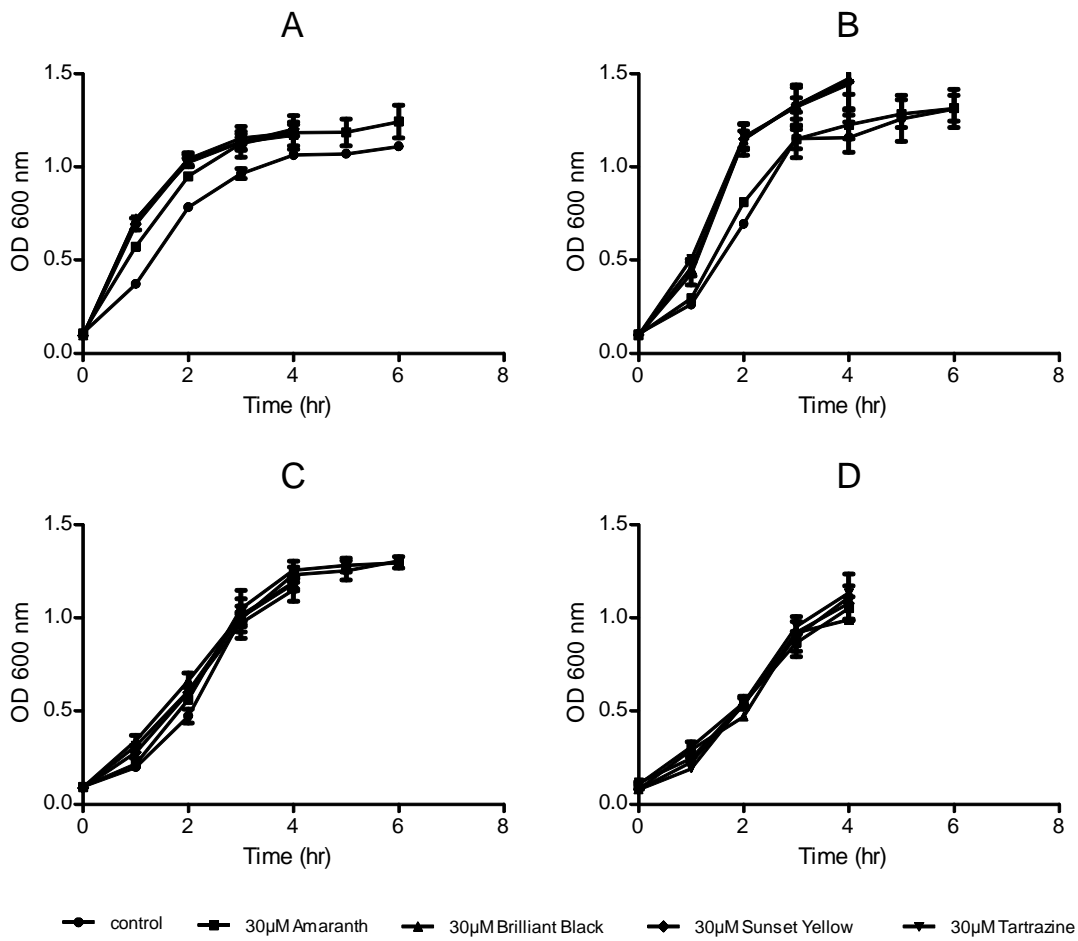

The bars represent the means of three experiments (+/- SD)

**Figure-S2:** Effect of azodyes on bacterial growth. Effect of used azodyes at a concentration of 30μM on the growth rates of the representative isolates: (A) AZO-Ec, (B) AZO-Ef, (C) AZO-Ev and (D) AZO-Bc. Readings represent the means of three experiments, and error bars represent the standard deviation.

**Supplementary Table 1:** Coefficient of determination ( $r^2$ ) of azoreductase decolorization kinetics of the four selected isolates against different concentrations of different azodyes.

| Isolate         | Substrate       | Substrate Concentration ( $\mu\text{M}$ ) | Zero-order $r^2$ | First-order $r^2$ | Isolate         | Substrate       | Substrate Concentration ( $\mu\text{M}$ ) | Zero-order $r^2$ | First-order $r^2$ |              |       |
|-----------------|-----------------|-------------------------------------------|------------------|-------------------|-----------------|-----------------|-------------------------------------------|------------------|-------------------|--------------|-------|
| AZO-Ev          | Amaranth        | 10                                        | <b>0.997</b>     | 0.929             | AZO-Ef          | Amaranth        | 10                                        | <b>0.981</b>     | 0.947             |              |       |
|                 |                 | 20                                        | <b>0.835</b>     | 0.729             |                 |                 | 20                                        | <b>0.981</b>     | 0.947             |              |       |
|                 |                 | 30                                        | <b>0.800</b>     | 0.704             |                 |                 | 30                                        | <b>0.981</b>     | 0.947             |              |       |
|                 | Brilliant Black | 10                                        | <b>0.999</b>     | 0.946             |                 | Brilliant Black | 10                                        | <b>0.999</b>     | 0.950             |              |       |
|                 |                 | 20                                        | <b>0.990</b>     | 0.892             |                 |                 | 20                                        | <b>0.999</b>     | 0.943             |              |       |
|                 |                 | 30                                        | <b>0.999</b>     | 0.928             |                 |                 | 30                                        | <b>0.999</b>     | 0.935             |              |       |
|                 | Sunset Yellow   | 10                                        | <b>0.999</b>     | 0.969             |                 | Sunset Yellow   | 10                                        | 0.930            | <b>0.959</b>      |              |       |
|                 |                 | 20                                        | <b>0.999</b>     | 0.969             |                 |                 | 20                                        | 0.839            | <b>0.954</b>      |              |       |
|                 |                 | 30                                        | <b>0.999</b>     | 0.981             |                 |                 | 30                                        | 0.943            | <b>0.973</b>      |              |       |
|                 | Tartrazine      | 10                                        | <b>0.983</b>     | 0.962             |                 | Tartrazine      | 10                                        | <b>0.933</b>     | 0.872             |              |       |
|                 |                 | 20                                        | <b>0.954</b>     | 0.875             |                 |                 | 20                                        | <b>0.955</b>     | 0.887             |              |       |
|                 |                 | 30                                        | <b>0.940</b>     | 0.854             |                 |                 | 30                                        | <b>0.977</b>     | 0.939             |              |       |
|                 | AZO-Ec          | Amaranth                                  | 10               | 0.864             |                 | <b>0.867</b>    | AZO-Bc                                    | Amaranth         | 10                | <b>0.728</b> | 0.693 |
|                 |                 |                                           | 20               | 0.892             |                 | <b>0.957</b>    |                                           |                  | 20                | <b>0.992</b> | 0.932 |
|                 |                 |                                           | 30               | 0.789             |                 | <b>0.948</b>    |                                           |                  | 30                | <b>0.995</b> | 0.976 |
| Brilliant Black |                 | 10                                        | <b>0.999</b>     | 0.960             | Brilliant Black | 10              |                                           | <b>0.904</b>     | 0.800             |              |       |
|                 |                 | 20                                        | <b>0.997</b>     | 0.926             |                 | 20              |                                           | <b>0.956</b>     | 0.860             |              |       |
|                 |                 | 30                                        | <b>0.995</b>     | 0.925             |                 | 30              |                                           | <b>0.861</b>     | 0.766             |              |       |
| Sunset Yellow   |                 | 10                                        | —                | —                 | Sunset Yellow   | 10              |                                           | 0.928            | <b>0.954</b>      |              |       |
|                 |                 | 20                                        | —                | —                 |                 | 20              |                                           | <b>0.926</b>     | 0.819             |              |       |
|                 |                 | 30                                        | —                | —                 |                 | 30              |                                           | <b>0.955</b>     | 0.871             |              |       |
| Tartrazine      |                 | 10                                        | <b>0.954</b>     | 0.905             | Tartrazine      | 10              |                                           | 0.944            | <b>0.979</b>      |              |       |
|                 |                 | 20                                        | <b>0.930</b>     | 0.924             |                 | 20              |                                           | <b>0.900</b>     | 0.833             |              |       |
|                 |                 | 30                                        | <b>0.821</b>     | 0.691             |                 | 30              |                                           | <b>0.976</b>     | 0.935             |              |       |
